# Supplementary material for: Zn Promoted Mg-Al Mixed Oxides-Supported Gold Nanoclusters for Direct Oxidative Esterification of Aldehyde to Ester
Source: MDPI journal article supplement (doi:10.3390/ijms22168668), 2021-08-12
Supplement: s1 [file s1]

# **Zn promoted Mg-Al mixed oxides supported gold nanoclusters for direct oxidative esterification of aldehyde to ester**

*Jie Li,<sup>[a]</sup> Shiyi Wang,<sup>[a]</sup> Huayin Li,<sup>[a]</sup> Yuan Tan,<sup>\*,[a]</sup> Yunjie Ding <sup>\*,[a,b,c]</sup>*

*<sup>a</sup> Hangzhou Institute of Advanced studies, Zhejiang Normal University, Hangzhou 311231, China.*

*<sup>b</sup> Dalian National Laboratory for Clean Energy, Dalian Institute of Chemical Physics, Chinese Academy of Sciences, Dalian 116023, China.*

*<sup>c</sup> The State Key Laboratory of Catalysis, Dalian Institute of Chemical Physics, Chinese Academy of Sciences, Dalian 116023, China.*

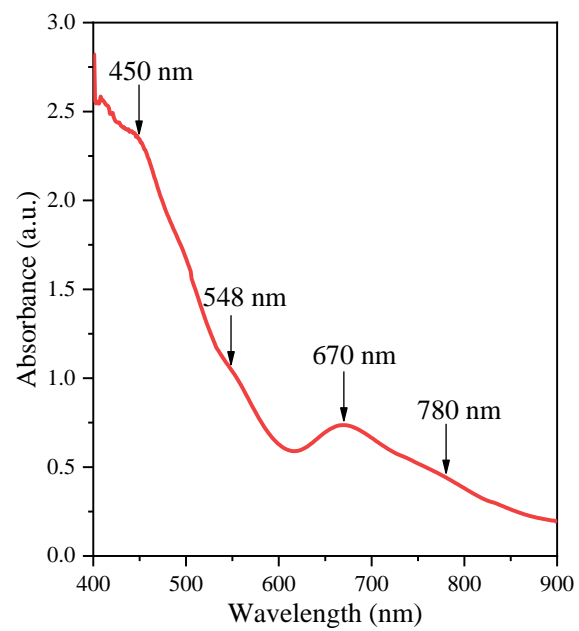

**Figure S1.** UV-visible spectra of just-synthesized Au<sub>25</sub> nanoclusters.

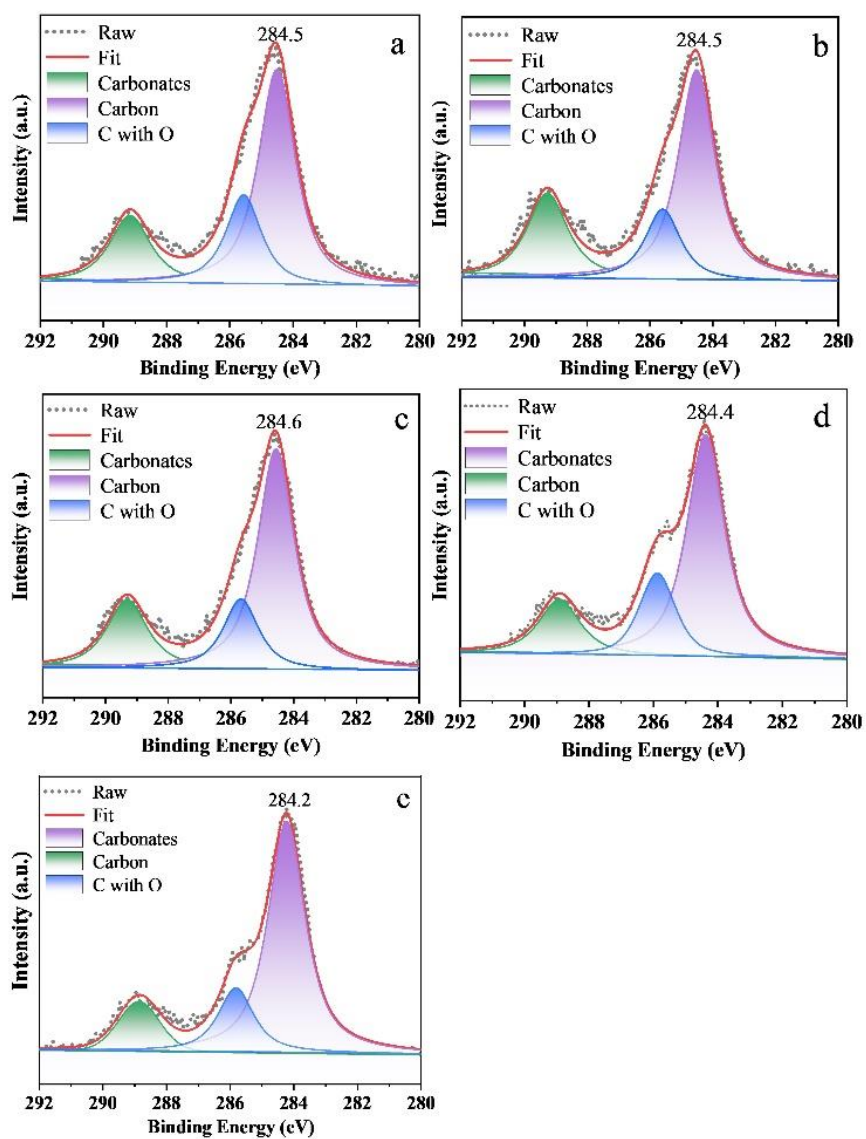

**Figure S2.** XPS spectra of C 1s of Zn-Mg-Al mixed oxides supported gold catalysts: (a) Au<sub>25</sub>/MgAl-400; (b) Au<sub>25</sub>/Zn<sub>0.03</sub>MgAl-400; (c) Au<sub>25</sub>/Zn<sub>0.33</sub>MgAl-400-; (d) Au<sub>25</sub>/Zn<sub>3</sub>MgAl-400; (e) Au<sub>25</sub>/ZnAl-400.

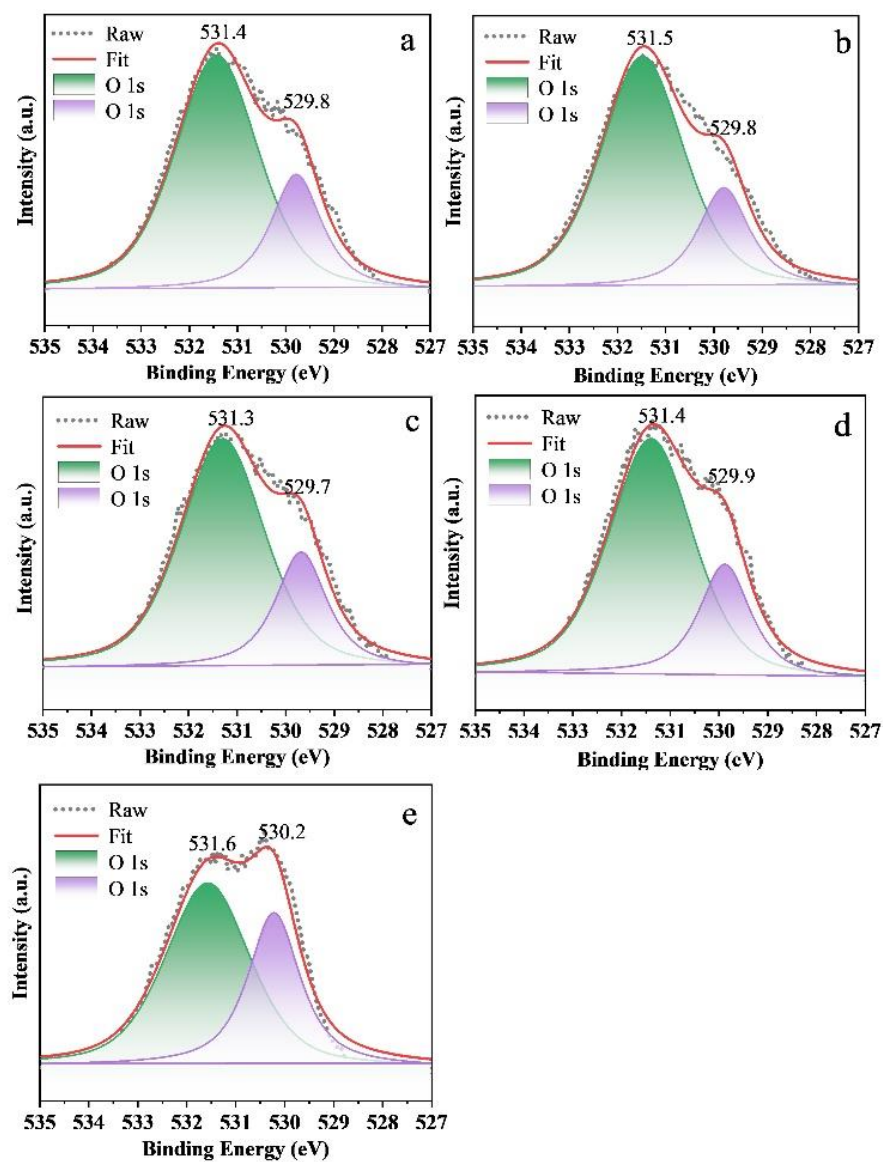

**Figure S3.** XPS spectra of O 1s of Zn-Mg-Al mixed oxides supported gold catalysts: (a)  $\text{Au}_{25}/\text{MgAl-400}$ ; (b)  $\text{Au}_{25}/\text{Zn}_{0.03}\text{MgAl-400}$ ; (c)  $\text{Au}_{25}/\text{Zn}_{0.33}\text{MgAl-400}$ ; (d)  $\text{Au}_{25}/\text{Zn}_3\text{MgAl-400}$ ; (e)  $\text{Au}_{25}/\text{ZnAl-400}$ .

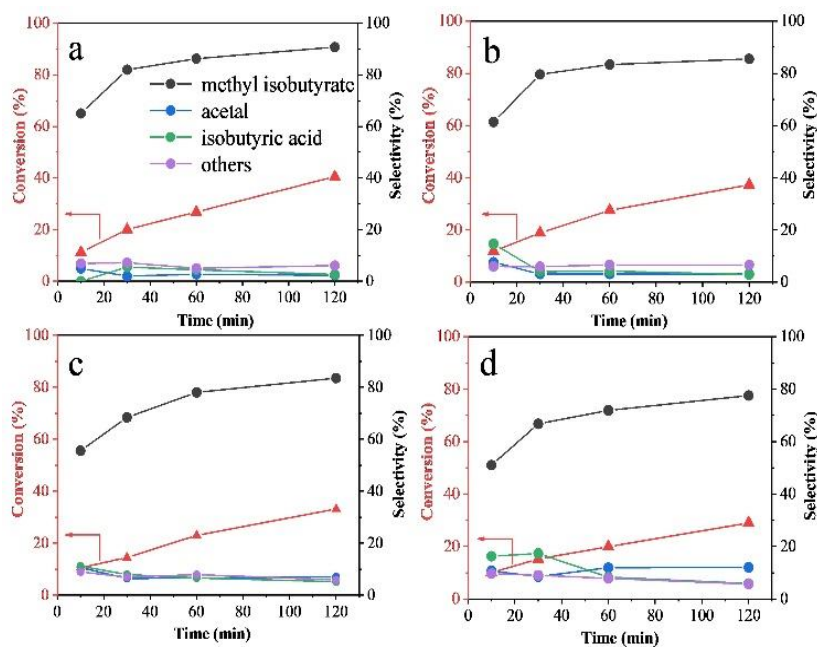

**Figure S4.** The products distribution of reaction with time courses: (a) Au<sub>25</sub>/MgAl-400; (b) Au<sub>25</sub>/Zn<sub>0.33</sub>MgAl-400; (c) Au<sub>25</sub>/Zn<sub>3</sub>MgAl-400; (d) Au<sub>25</sub>/ZnAl-400. Reaction conditions: 5 mmol of isobutyl aldehyde and 5 mL of methanol; Catalyst: 30 mg; Pressure of O<sub>2</sub>: 4 atm; Reaction temperature: 80 °C.
